# Supplementary material for: Polymorphism or pseudopolymorphism of a macrocyclic compound: helical structure, layered structure and pseudorotaxane constructed by weak intermolecular interactions
Source: Royal Society of Chemistry journal article supplement (doi:10.1039/c0ce00058b), 2010-01-01
Supplement: c0ce00058b.pdf [file c0ce00058b.pdf]

## Supplementary Information

# **Polymorphism or Pseudopolymorphism of a Macrocyclic Compound: Helical Structure, Layered Structure, and Pseudorotaxane Constructed by Weak Intermolecular Interactions**

Taichi Tohaya, Kosuke Katagiri, Junya Katoh, Hyuma Masu,

Masahide Tominaga and Isao Azumaya\*

*Faculty of Pharmaceutical Sciences at Kagawa Campus*

*Tokushima Bunri University*

*1314-1 Shido, Sanuki, Kagawa 769-2193, Japan*

E-mail: [azumayai@kph.bunri-u.ac.jp](mailto:azumayai@kph.bunri-u.ac.jp)

## 1. General Information

Melting points were determined by using ATM-01 (AS ONE).  $^1\text{H}$  and  $^{13}\text{C}$  NMR spectrum was performed on a Bruker AV400 spectrometer ( $^1\text{H}$  operating frequency of 400 MHz) at 298 K in chloroform- $d_3$ . Low mass spectrum was obtained on a JEOL MStation JMS-700 spectrometer, and high mass spectrum was obtained on a JEOL AccuTOF JMS-T100LC spectrometer. X-ray data were collected on a Bruker SMART ApexII and a Bruker SMART 1000 CCD detector. Crystal structures were solved by direct methods SHELXS-97 (Sheldrick, 1996) and refined by full-matrix least-squares SHELXL-97 (Sheldrick, 1997). All non-hydrogen atoms were refined anisotropically. All hydrogen atoms were included as their calculated positions. Column chromatography was performed by using a Wakogel C200, and thin-layer chromatography was carried out on 2.00 mm Merck precoated silica gel glass plates. Gel Permeation Chromatography (GPC) was performed using recycling preparative HPLC (LC-9204, Japan Analytical Industry Co., Ltd.) and a JAIGEL H series column (Japan Analytical Industry Co., Ltd.). Solid-state CD spectra were measured using a KBr tablet. A mixture of 0.1 mg of the crystal and 100 mg of KBr were well-ground and formed into the tablet with a radius of 5 mm. Differential scanning calorimetry (DSC) was measured at a heating rate of 10 K/min. Samples weighing 1–3 mg were heated in open aluminum pans at a rate of 10 K/min under a nitrogen gas flow of 4 mL/min.

**2. Preparation of cyclic aromatic hydrocarbon 1.** To a solution of tetrachlorotitanium (2.19 mL, 20 mmol) in 1,4-dioxane (150 mL), the zinc powder (2.61 g, 40 mmol) was added slowly with stirring at  $-10\text{ }^\circ\text{C}$  under argon atmosphere, and then the mixture was heated at reflux for 2 h. To the suspension, a solution of 1-acetyl-4-(4'-acetylphenyl)benzene (0.482 g, 2 mmol) in 1,4-dioxane (50 mL) was added, and then the mixture was heated at reflux for 18 h. A quenching solution of 10%  $\text{K}_2\text{CO}_3$  in water was carefully introduced and the mixture was extracted with diethyl ether. The organic layer was washed with brine and dried over  $\text{Na}_2\text{SO}_4$ , and evaporated to give a crude product, which was purified by silica gel column chromatography (eluent:  $\text{CHCl}_3$ :hexane=1:3) and preparative gel permeation chromatography with chloroform as the mobile phase to give the macrocycle **1** in 11% yield: mp  $>300\text{ }^\circ\text{C}$  (decomposed); FT-IR (ATR,  $\text{cm}^{-1}$ ): 3019, 1652, 1540, 1507, 820.;  $^1\text{H}$  NMR (400 MHz,  $\text{CDCl}_3$ ,  $27\text{ }^\circ\text{C}$ ):  $\delta$  7.30 (d,  $J = 8.4\text{ Hz}$ , 12H), 6.93 (d,  $J = 8.4\text{ Hz}$ , 12H) and 2.17 ppm (s, 18H);  $^{13}\text{C}$  NMR (400 MHz,  $\text{CDCl}_3$ ):  $\delta$  143.62, 137.15, 133.15 (C), 129.34 (CH), 125.42 (CH) and 21.10 ( $\text{CH}_3$ ) ppm.; FAB-MS  $m/z$  618.7; ESI-HRMS  $m/z$  found 619.33593, calc. for  $\text{C}_{48}\text{H}_{42}$   $m/z$  619.33526.

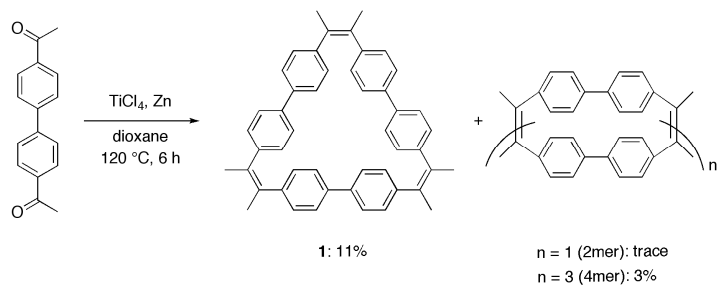

**Fig. S1** Synthesis of macrocyclic hydrocarbons.

### 3. <sup>1</sup>H NMR and <sup>13</sup>C NMR Spectrum Data

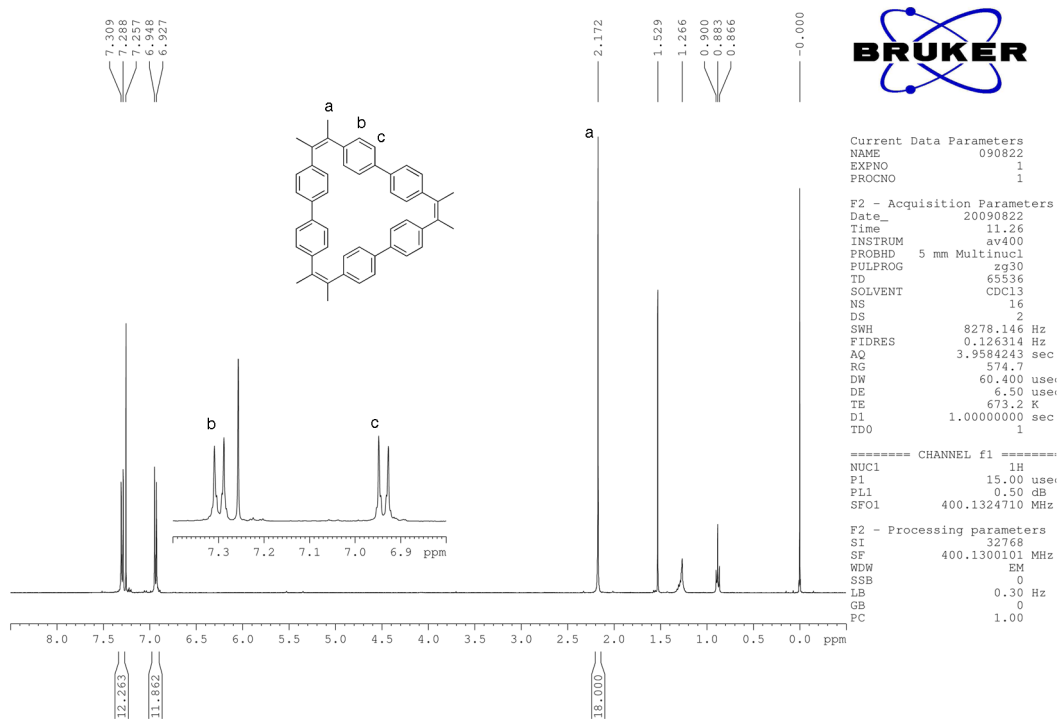

Fig. S2 <sup>1</sup>H NMR of 1

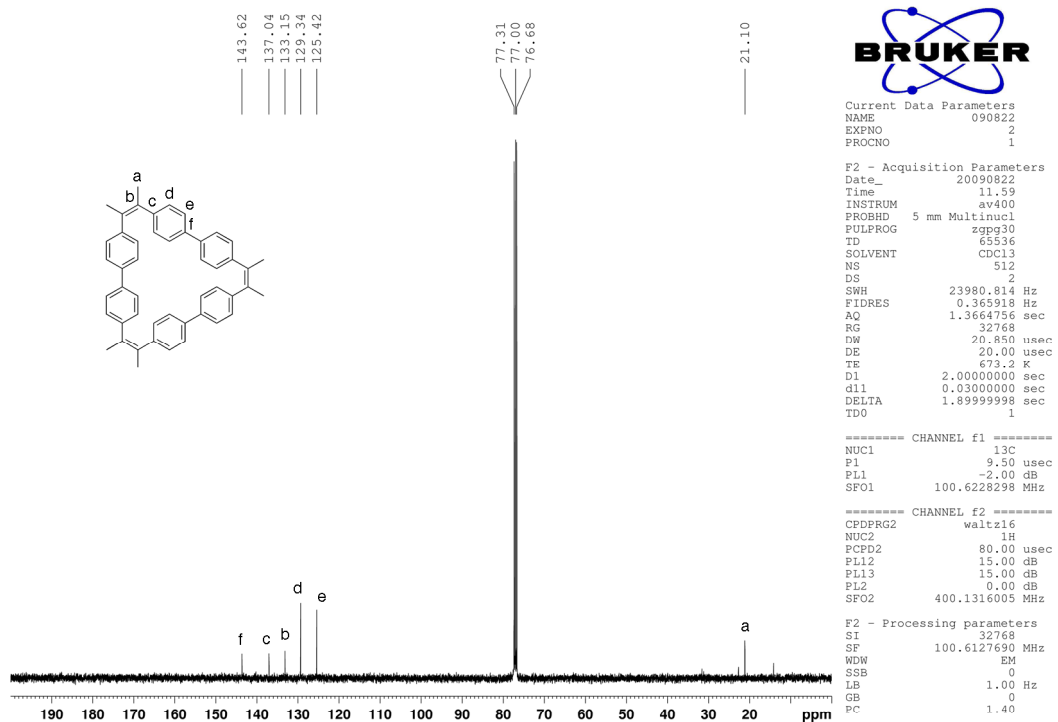

Fig. S3 <sup>13</sup>C NMR of 1

#### 4. X-ray Crystallographic Analyses Data.

**Crystal data for 1a.**  $C_{48}H_{42}$ ;  $M = 618.82 \text{ g mol}^{-1}$ , colorless plate measuring  $0.40 \times 0.20 \times 0.20 \text{ mm}$ , hexagonal,  $P6_1$ ,  $a = b = 15.071(17)$ ,  $c = 28.95(4) \text{ \AA}$ ,  $V = 5695(12) \text{ \AA}^3$ ,  $Z = 6$ ,  $D_c = 1.083 \text{ Mg m}^{-3}$ ,  $T = 100 \text{ K}$ ,  $\mu (\text{MoK}\alpha) = 0.061 \text{ mm}^{-1}$ ,  $2\theta_{\text{max}} = 41.34^\circ$ , 16750 reflections, 1989 unique reflections ( $R_{\text{int}} = 0.0940$ ) which were used in all calculations.  $R_1 = 0.1078$ ,  $wR_2 = 0.1858$  (all data)  $R_1 = 0.0615$ ,  $wR_2 = 0.1447$  ( $I > 2\sigma(I)$ ) for 440 parameters. CCDC reference number 748361.

Chirality and space group of the crystal were not determined because Friedel pairs were merged before the final refinement.

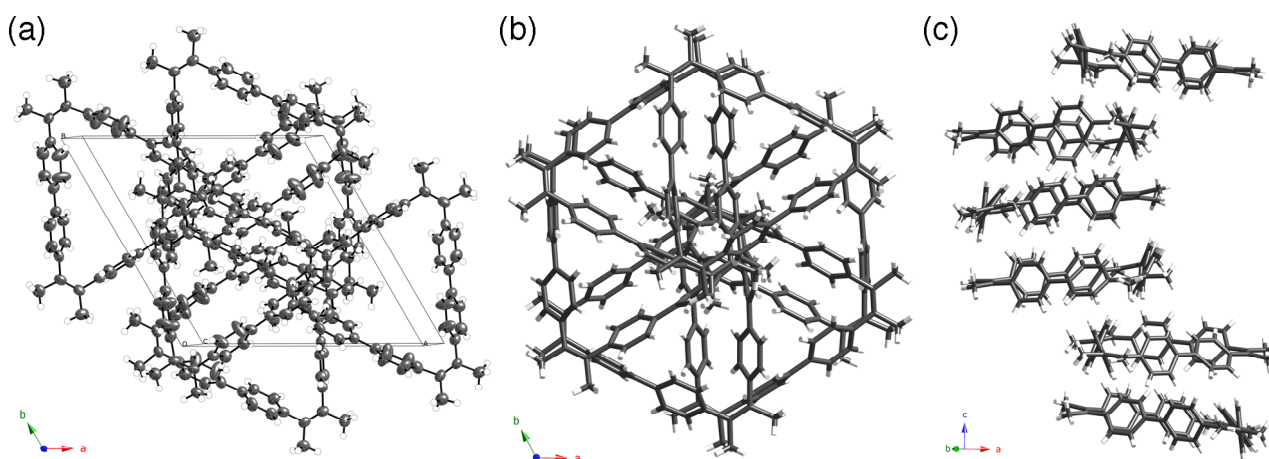

**Fig. S4** (a) Thermal ellipsoids model of unit cell of **1a**. Ellipsoids of all non-hydrogen atoms are drawn at the 50% probability. (b) Top view of helical structure of **1a**. (c) Side view of helical structure of **1a**.

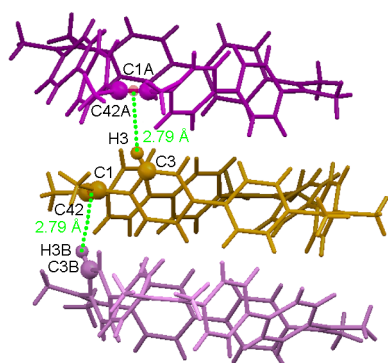

**Fig. S5** C–H... $\pi$  (olefin) interactions between adjacent molecules in the crystal **1a**. Symmetry codes:  $A = -1+x, -1+y, z$ ;  $B = y, 1-x, -1/6+z$ .

**Table S1** Details of the selected interactions of the crystal **1a**.

| D–H...A                   | D–H  | H...A | D...A     | D–H...A | symop-for-A       |
|---------------------------|------|-------|-----------|---------|-------------------|
| C3 H3 Cg1 <sup>a</sup>    | 0.95 | 2.79  | 3.632(12) | 148     | $y, -x+y, -1/6+z$ |
| C43 H43A Cg2 <sup>b</sup> | 0.99 | 2.93  | 3.742(15) | 141     | $-x+1, y, z$      |

<sup>a</sup>Cg1: the center of the olefine (C1=C42)

<sup>b</sup>Cg2: the center of the phenyl ring (C16–C21)

**Crystal data for 1b.**  $C_{48}H_{42}$ ;  $M = 618.82 \text{ g mol}^{-1}$ , colorless plate measuring  $0.40 \times 0.20 \times 0.20 \text{ mm}$ , monoclinic,  $P2_1/c$ ,  $a = 11.951(1)$ ,  $b = 24.458(3)$ ,  $c = 13.2828(1) \text{ \AA}$ ,  $\beta = 113.400(1)^\circ$ ,  $V = 3562.9(7) \text{ \AA}^3$ ,  $Z = 4$ ,  $D_c = 1.154 \text{ Mg m}^{-3}$ ,  $T = 150 \text{ K}$ ,  $\mu (\text{MoK}\alpha) = 0.065 \text{ mm}^{-1}$ ,  $2\theta_{\text{max}} = 27.02^\circ$ , 16772 reflections, 7073 unique reflections ( $R_{\text{int}} = 0.406$ ) which were used in all calculations.  $R_1 = 0.1139$ ,  $wR_2 = 0.1742$  (all data)  $R_1 = 0.0547$ ,  $wR_2 = 0.1388$  ( $I > 2\sigma(I)$ ) for 439 parameters. CCDC reference number 748362.

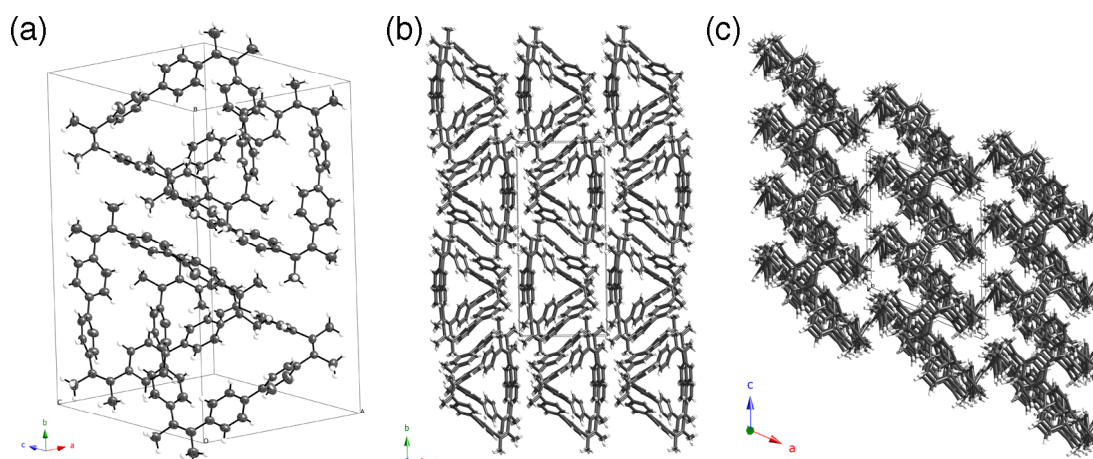

**Fig. S6** (a) Thermal ellipsoids model of unit cell of **1b**. Ellipsoids of all non-hydrogen atoms are drawn at the 50% probability. (b) Top view of layer structure of **1b**. (c) Side view of layer structure of **1b**.

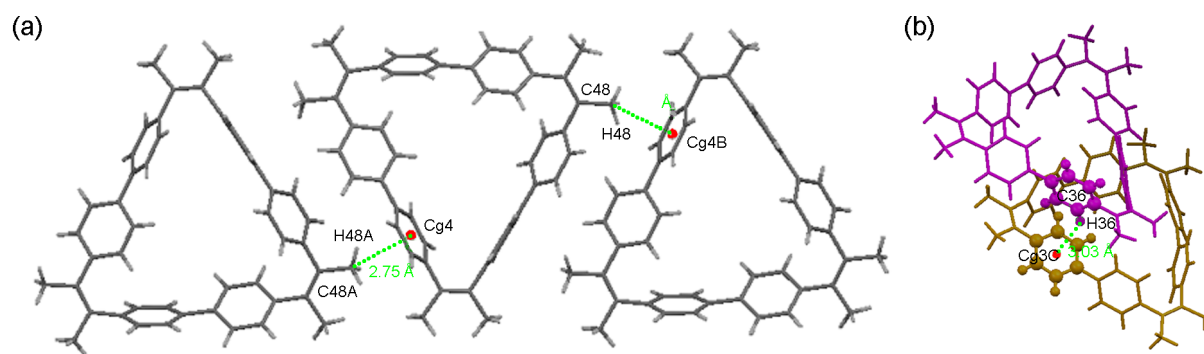

**Fig. S7** (a) Weak C–H... $\pi$  interactions between adjacent molecules of **1b**. (b) Tilted T-shaped aromatic–aromatic interactions between adjacent molecules in the crystal **1b**. Symmetry codes: A =  $1-x, 1/2+y, 1/2-z$ ; B =  $1-x, -1/2+y, 1/2-z$ ; C =  $x, 1/2-y, -1/2+z$ .

**Table S2** Details of the selected interactions of the crystal **1b**.

| D–H...A                  | D–H  | H...A | D...A    | D–H...A | symop-for-A          |
|--------------------------|------|-------|----------|---------|----------------------|
| C20 H20 Cg2 <sup>a</sup> | 0.95 | 2.52  | 3.286(2) | 137     | $x, y, z$            |
| C36 H36 Cg3 <sup>b</sup> | 0.95 | 3.03  | 3.834(4) | 143     | $x, 1/2-y, -1/2+z$   |
| C48 H48 Cg4 <sup>c</sup> | 0.98 | 2.75  | 3.395(1) | 124     | $1-x, -1/2+y, 1/2-z$ |

<sup>a</sup>Cg2: the center of the phenyl ring (C9–C14)

<sup>b</sup>Cg3: the center of the phenyl ring (C19–C24)

<sup>c</sup>Cg4: the center of the phenyl ring (C25–C30)

**Crystal data for 1c.**  $C_{48}H_{42} \cdot C_6H_{12}$ ;  $M = 704.99 \text{ g mol}^{-1}$ , colorless plate measuring  $0.30 \times 0.20 \times 0.20 \text{ mm}$ , triclinic,  $P-1$ ,  $a = 14.762(9)$ ,  $b = 15.100(9)$ ,  $c = 22.11(1) \text{ \AA}$ ,  $\alpha = 77.18(1)$ ,  $\beta = 74.95(1)$ ,  $\gamma = 62.186(9)^\circ$ ,  $V = 4181(4) \text{ \AA}^3$ ,  $Z = 4$ ,  $D_c = 1.120 \text{ Mg m}^{-3}$ ,  $T = 150 \text{ K}$ ,  $\mu (\text{MoK}\alpha) = 0.063 \text{ mm}^{-1}$ ,  $2\theta_{\text{max}} = 27.69^\circ$ , 25347 reflections, 18414 unique reflections ( $R_{\text{int}} = 0.0912$ ) which were used in all calculations.  $R_1 = 0.2878$ ,  $wR_2 = 0.2262$  (all data)  $R_1 = 0.0849$ ,  $wR_2 = 0.1836$  ( $I > 2\sigma(I)$ ) for 989 parameters. CCDC reference number 748363.

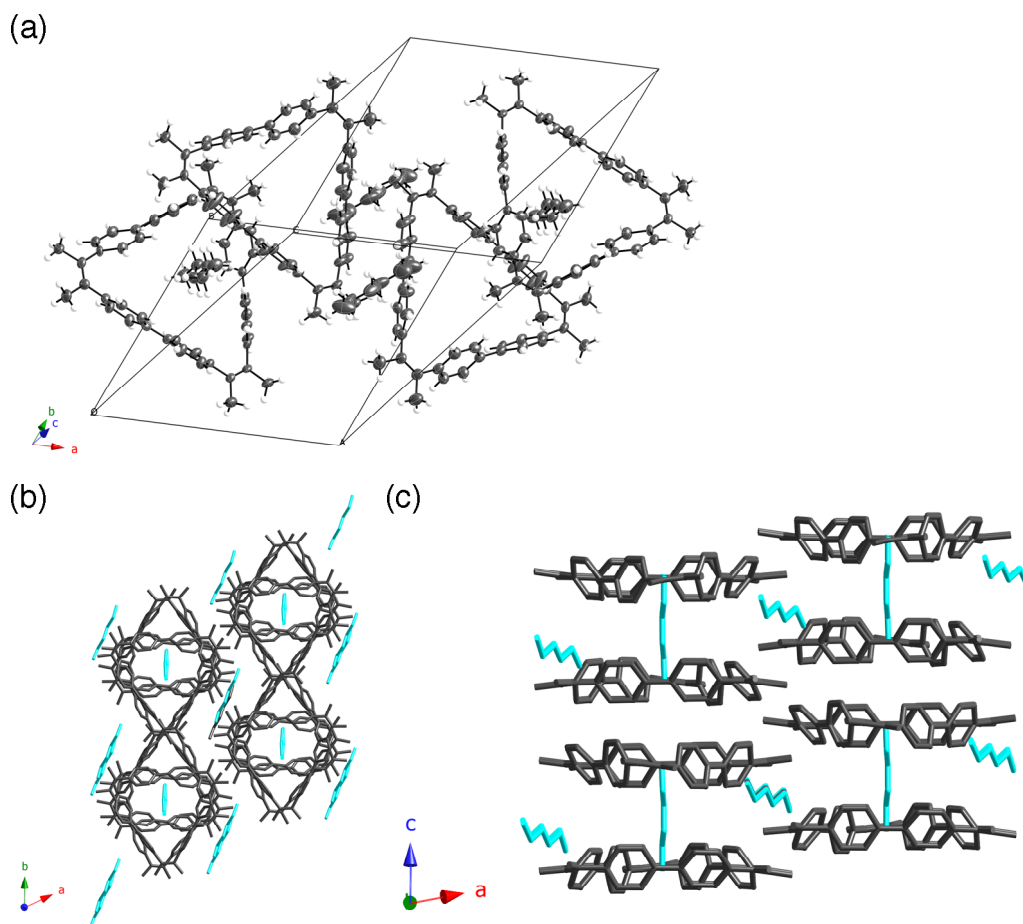

**Fig. S8** (a) Thermal ellipsoids model of unit cell of **1c**. Ellipsoids of all non-hydrogen atoms are drawn at the 50% probability. (b) Top view of **1c**. (c) Side view of **1c**. The hydrogen atoms are omitted for clarity, and *n*-hexane is shown in turquoise blue.

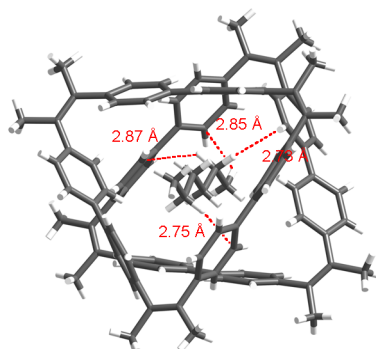

**Fig. S9** van der Waals contacts between the hexane and the cyclic trimers.

**Crystal data for 1d.**  $C_{48}H_{42} \cdot C_4H_8O_2$ ;  $M = 706.92 \text{ g mol}^{-1}$ , colorless plate measuring  $0.20 \times 0.20 \times 0.20 \text{ mm}$ , triclinic,  $P-1$ ,  $a = 11.385(3)$ ,  $b = 14.405(4)$ ,  $c = 14.984(4) \text{ \AA}$ ,  $\alpha = 115.121(4)$ ,  $\beta = 95.522(4)$ ,  $\gamma = 109.930(4)^\circ$ ,  $V = 2006.0(9) \text{ \AA}^3$ ,  $Z = 2$ ,  $D_c = 1.170 \text{ Mg m}^{-3}$ ,  $T = 120 \text{ K}$ ,  $\mu(\text{MoK}\alpha) = 0.069 \text{ mm}^{-1}$ ,  $2\theta_{\text{max}} = 27.56^\circ$ , 11995 reflections, 8724 unique reflections ( $R_{\text{int}} = 0.0279$ ) which were used in all calculations.  $R_1 = 0.1252$ ,  $wR_2 = 0.2665$  (all data)  $R_1 = 0.0831$ ,  $wR_2 = 0.2373$  ( $I > 2\sigma(I)$ ) for 495 parameters. CCDC reference number 748364.

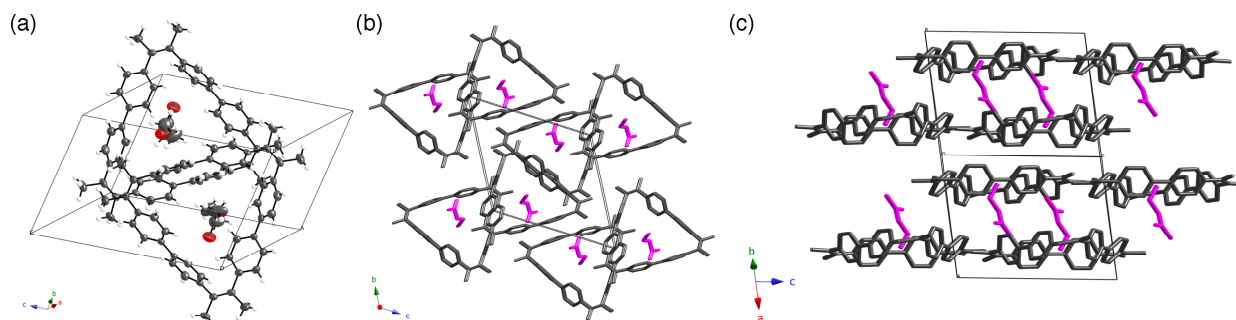

**Fig. S10** (a) Thermal ellipsoids model of unit cell of **1d**. Ellipsoids of all non-hydrogen atoms are drawn at the 50% probability. (b) Top view of **1d**. (c) Side view of **1d**. The hydrogen atoms are omitted for clarity, and ethyl acetate is shown in magenta.

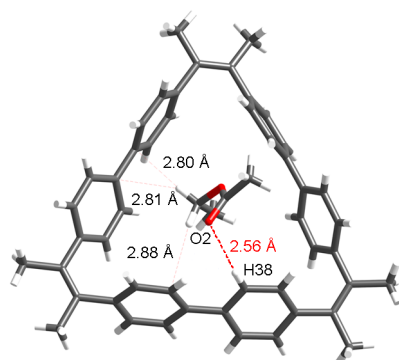

**Fig. S11** Hydrogen-bonds (C–H...O) and weak interactions between the guest molecule (ethyl acetate) and the host molecule **1**.

**Table S3** Details of the selected interactions of the crystal **1d**.

| D–H...A    | D–H  | H...A | D...A    | D–H...A | symop-for-A |
|------------|------|-------|----------|---------|-------------|
| C38 H38 O2 | 0.95 | 2.56  | 3.493(5) | 169     | x, y, z     |



## 5. DSC Spectra for crystal 1a.

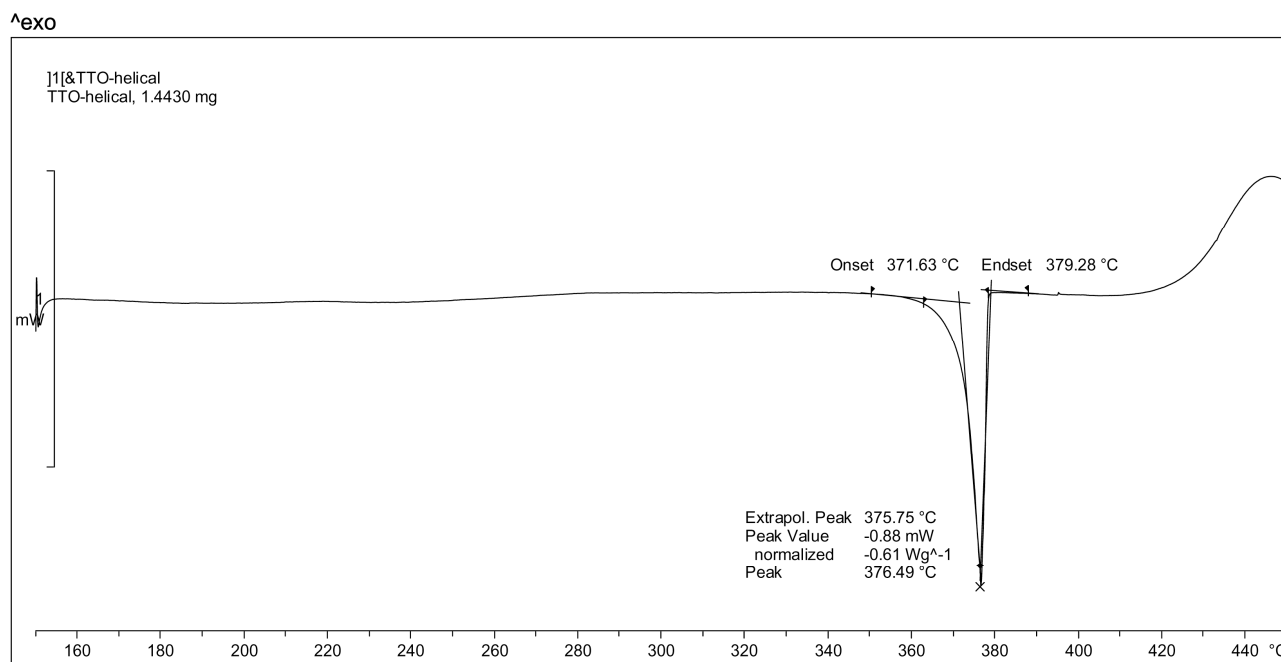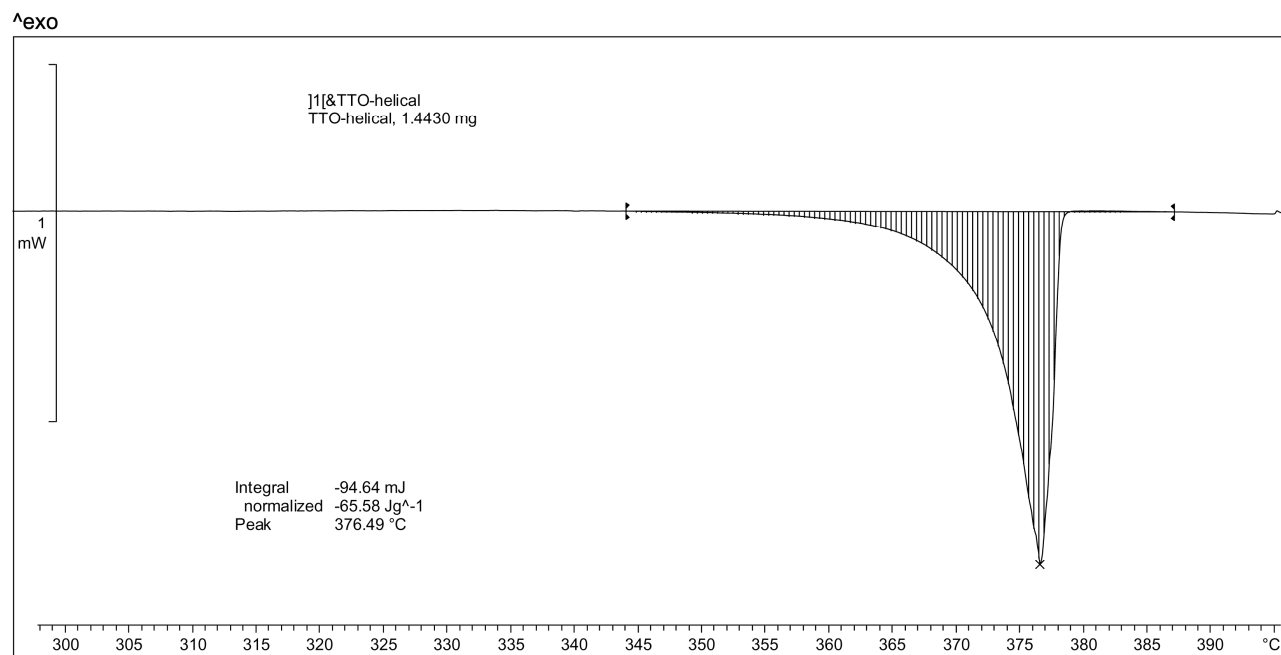

**Fig. S12** DSC heating curves of **1a**; scanning rate 10 °C/min.

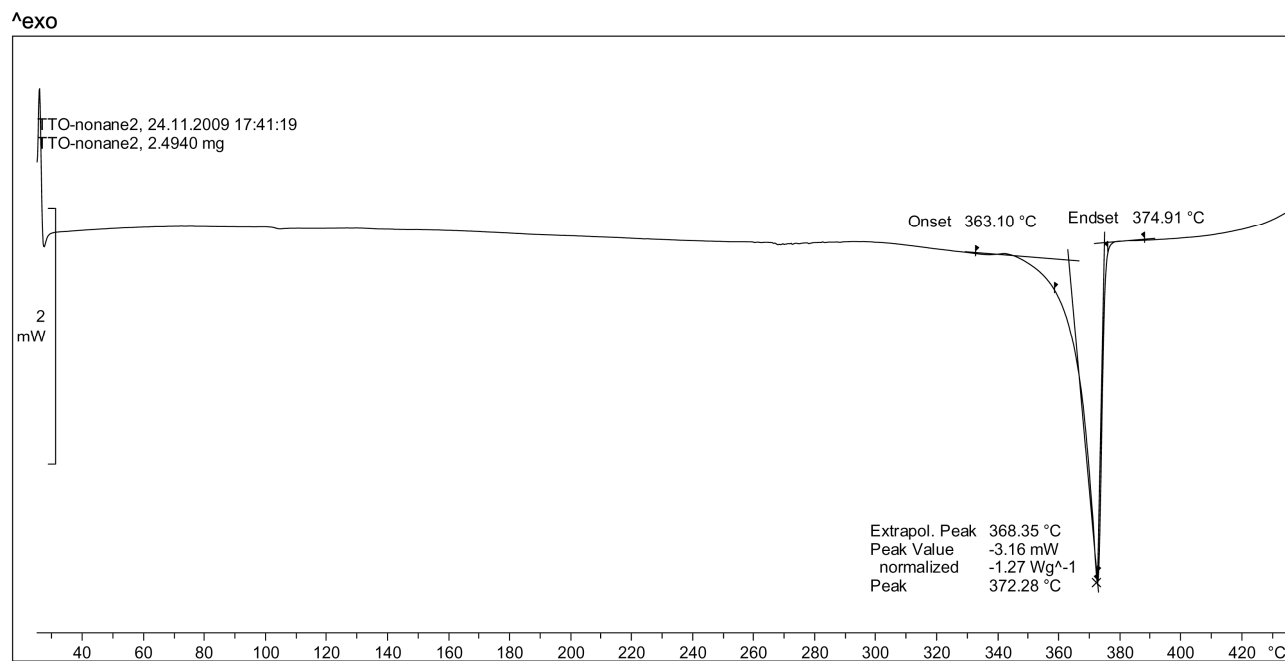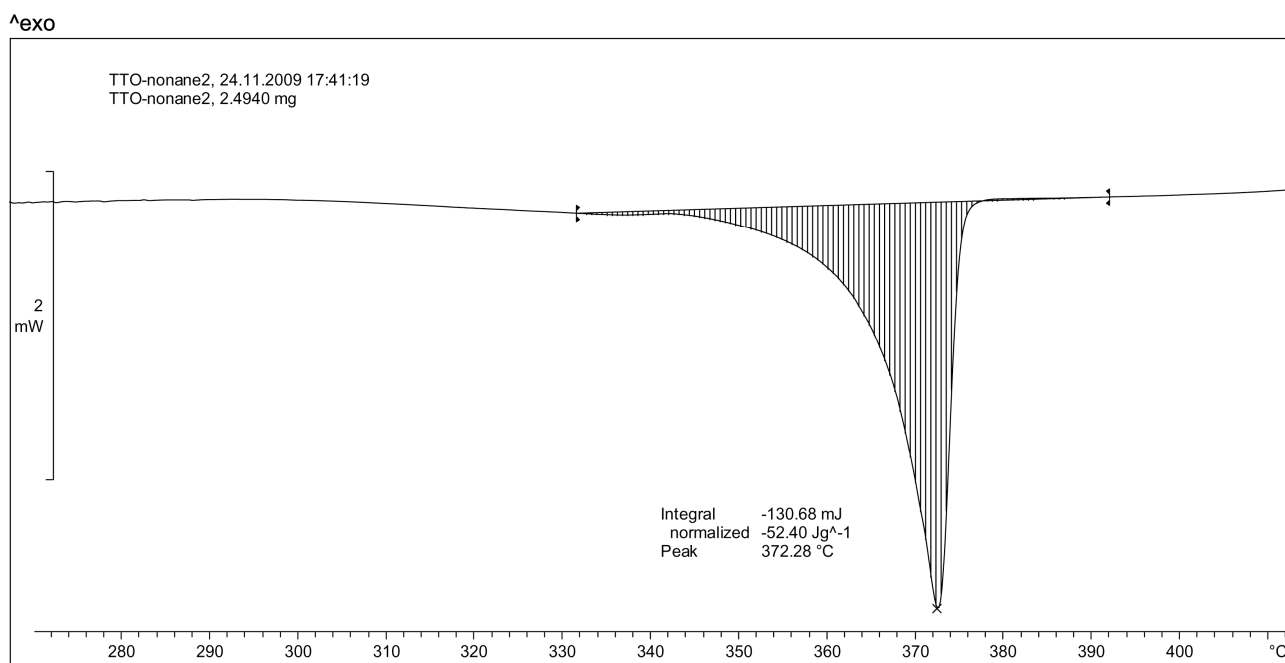

**Fig. S13** DSC heating curves of **1b**; scanning rate 10 °C/min.

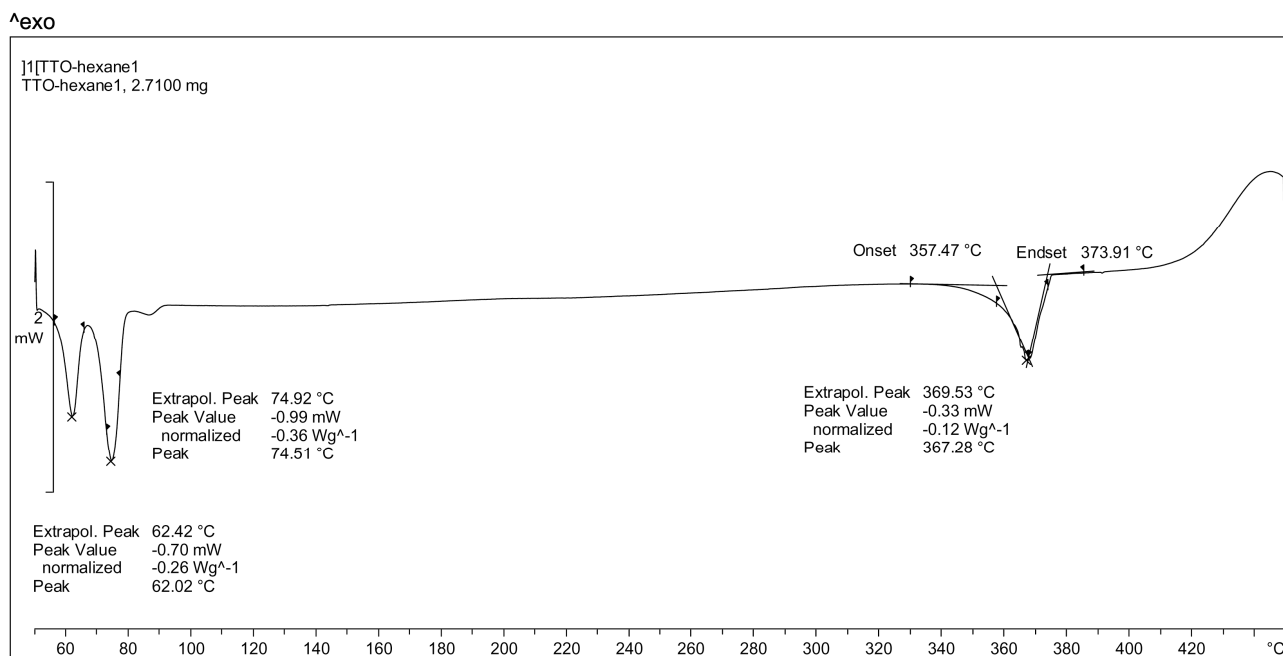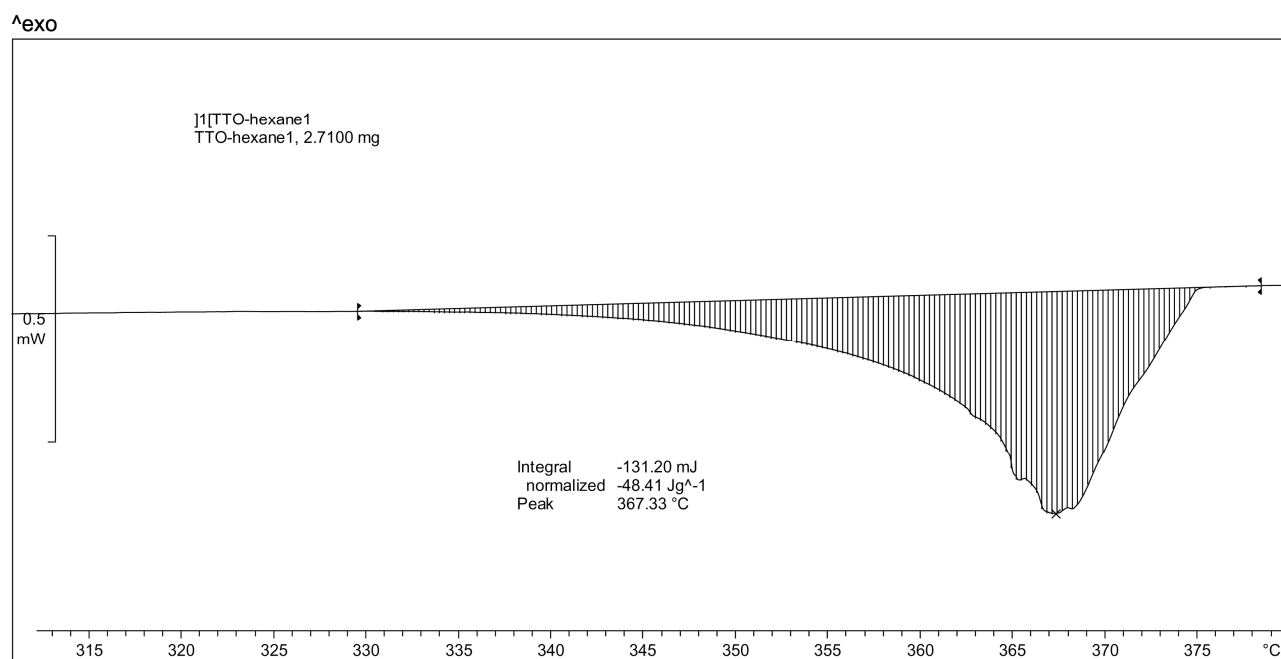

**Fig. S14** DSC heating curves of **1c**; scanning rate 10 °C/min.

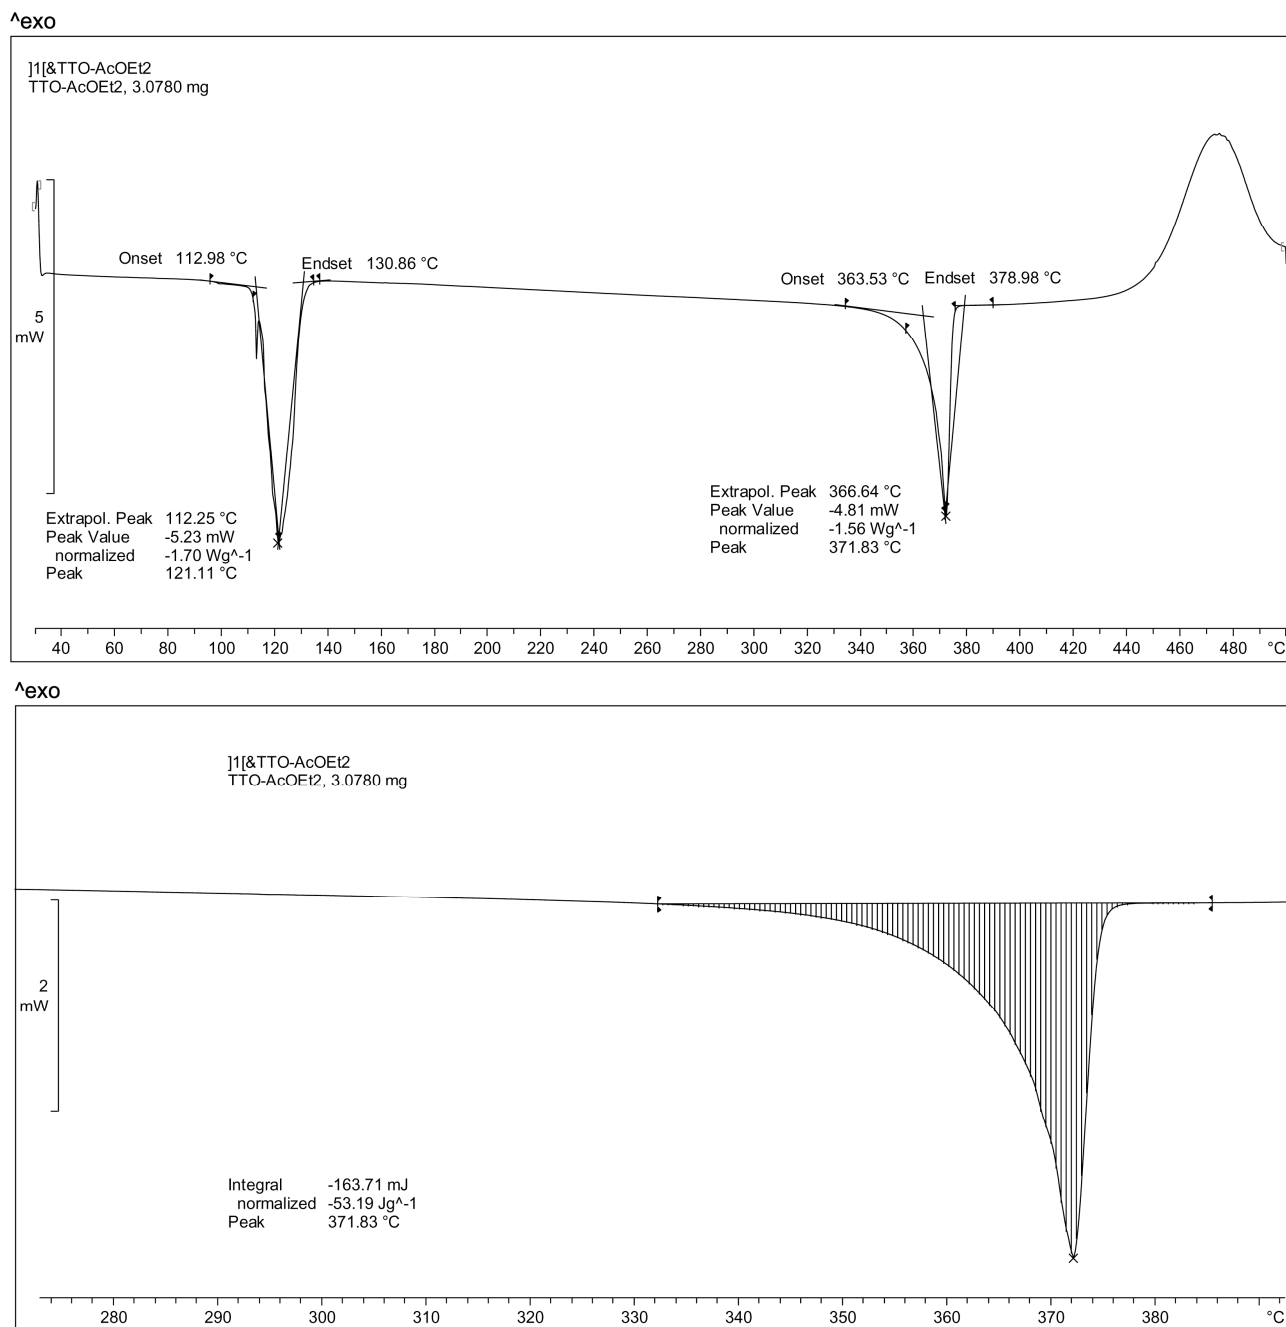

**Fig. S15** DSC heating curves of **1d**; scanning rate 10 °C/min.
